# Supplementary material for: Comparative eco-physiology revealed extensive enzymatic curtailment, lipases production and strong conidial resilience of the bat pathogenic fungus Pseudogymnoascus destructans
Source: PubMed Central journal article supplement (PMC7536203; doi:10.1038/s41598-020-73619-7), 2020-10-05
Supplement: 41598_2020_73619_MOESM1_ESM.pdf [file 41598_2020_73619_MOESM1_ESM.pdf]

**Title:** Comparative eco-physiology revealed extensive enzymatic curtailment, lipases production and strong conidial resilience of the bat pathogenic fungus *Pseudogymnoascus destructans*

**Authors:** Tereza Veselská<sup>1,2</sup>, Karolína Homutová<sup>1</sup>, Paula García Fraile<sup>1</sup>, Alena Kubátová<sup>2</sup>, Natália Martínková<sup>3</sup>, Jiří Pikula<sup>4</sup>, Miroslav Kolařík<sup>1\*</sup>

**Affiliations:**<sup>1</sup> Laboratory of Fungal Genetics and Metabolism, Institute of Microbiology, Czech Academy of Sciences (CAS), Vídeňská 1083, CZ-14220 Prague, Czech Republic

<sup>2</sup> Department of Botany, Faculty of Science, Charles University in Prague, Benátská 2, CZ-12801 Prague, Czech Republic

<sup>3</sup> Institute of Vertebrate Biology, Czech Academy of Sciences, Květná 8, CZ-60365 Brno, Czech Republic

<sup>4</sup> Department of Ecology and Diseases of Game, Fish and Bees, University of Veterinary and Pharmaceutical Sciences Brno, Palackého třída 1946/1, CZ-61242 Brno, Czech Republic

\***Corresponding author:** Miroslav Kolařík, Fax: +420 241 062 347, phone: Institute of Microbiology (+420) 29644 2332, E-mail: [mkolařík@biomed.cas.cz](mailto:mkolařík@biomed.cas.cz)

**Table S1:** The most utilised nutrient sources on each Biolog MicroPlates tested.

| Nutrient sources     | <i>P. destructans</i>                      | Cave fungi                | Dermatophytes                                   |
|----------------------|--------------------------------------------|---------------------------|-------------------------------------------------|
| Carbon               | Tween 80                                   | D-Trehalose               | L-Phenylalanine                                 |
|                      | D-Mannose                                  | Gentibiose                | L-Glutamic Acid                                 |
|                      | Gentibiose                                 | $\alpha$ -D-Glucose       | L-Alanine                                       |
|                      | D-Trehalose                                | D-Fructose                | Glycyl-L-Glutamic Acid                          |
|                      | D-Fructose                                 | N-Acetyl-D-Glucosamine    | N-Acetyl-D-Glucosamine                          |
|                      | $\alpha$ -D-Glucose                        | Maltose                   | L-Analyl-Glycine                                |
|                      | Glycogen                                   | D-Mannose                 | L-Ornithine                                     |
|                      | L-Glutamic Acid                            | D-Psicose                 | $\alpha$ -D-Glucose                             |
|                      | Turanose                                   | Sucrose                   | D-Mannose                                       |
|                      | D-Psicose                                  | Glycerol                  | Alaninamid                                      |
| Nitrogen             | Gly-Gln                                    | Guanosine                 | Ala-Glu                                         |
|                      | Urea                                       | L-Arginine                | Gly-Glu                                         |
|                      | Guanosine                                  | Urea                      | L-Citrulline                                    |
|                      | Gly-Asn                                    | Gly-Asn                   | Ala-Gln                                         |
|                      | Gly-Glu                                    | Ala-Gly                   | Gly-Gln                                         |
|                      | allantoin                                  | Gly-Gln                   | Ala-Leu                                         |
|                      | Ala-Gly                                    | L-Alanine                 | Ala-Gly                                         |
|                      | L-Glutamine                                | Uric Acid                 | L-Ornithine                                     |
|                      | Ammonia                                    | Ala-Leu                   | L-Arginine                                      |
|                      | Uric Acid                                  | N-Acetyl-D-Glucosamine    | L-Glutamine                                     |
| Sulphur + Phosphorus | Cytidine-2-Monophosphate                   | Cytidine-2-Monophosphate  | O-Phospho-D-Tyrosine                            |
|                      | O-Phosphoryl-Ethanolamine                  | O-Phosphoryl-Ethanolamine | O-Phospho-L-Tyrosine                            |
|                      | O-Phospho-L-Serine                         | Thymidine-3-Monophosphate | Tripolyphosphate                                |
|                      | 6-Phospho-Gluonic Acid                     | Guanosine-2-Monophosphate | Cytidine-2-Monophosphate                        |
|                      | Guanosine-2-Monophosphate                  | Adenosine-5-Monophosphate | O-Phospho-L-Serine                              |
|                      | 2-Deoxy-D-Glucose 6-Phosphate              | Guanosine-5-Monophosphate | Phosphoenol Pyruvate                            |
|                      | D-3-Phospho-Glyceric Acid                  | Cytidine-5-Monophosphate  | Guanosine-2-Monophosphate                       |
|                      | Carbamyl Phosphate                         | Phosphocreatine           | Guanosine-5-Monophosphate                       |
|                      | Uridine-5-Monophosphate                    | D-2-Phospho-Glyceric Acid | Adenosine-2-Monophosphate                       |
|                      | Guanosine-5-Monophosphate                  | Cytidine-3-Monophosphate  | Guanosine-2-,3-Cyclic Monophosphate             |
| Nutrient Supplements | L-Lysine                                   | Orotic Acid               | Tween 20                                        |
|                      | L-Leucine                                  | Pyridoxal                 | D,L-Mevalonic Acid                              |
|                      | L-Valine                                   | D-Alanine                 | $\beta$ -Nicotinamide Adenine Dinucleotide      |
|                      | Orotic Acid                                | D-Glutamic Acid           | Folic Acid                                      |
|                      | L-Isoleucine + L-Valine                    | L-Cysteine                | D-(+)-Glucose                                   |
|                      | D,L- $\alpha,\delta$ -Diamino-Pimelic Acid | Pyridoxamine              | Menadlone                                       |
|                      | D-Alanine                                  | Adenine                   | ( $\delta$ ) 4-Amino-Imidazole-4(5)-Carboxamide |
|                      | L-Tyrosine                                 | Phenylalanine             | Inosine + Thiamine                              |
|                      | L-Cysteine                                 | L-Methionine              | p-Amino-Benzoic Acid                            |
|                      | Trans-4-Hydroxy L-Proline                  | L-Valine                  | Orotic Acid                                     |

**Table S2:** Medium alkalisation by urea degradation.

| Fungal strains                               | Sabouraud medium |      |      | Sabouraud medium with urea |      |      |
|----------------------------------------------|------------------|------|------|----------------------------|------|------|
|                                              | A                | B    | C    | A                          | B    | C    |
| <i>Pseudogymnoascus destructans</i> 20631-21 | 6.04             | 5.87 | 6.04 | 8.26                       | 8.29 | 8.41 |
| <i>P. destructans</i> CCF3941                | 4.98             | 4.86 | 4.86 | 7.85                       | 7.94 | 7.38 |
| <i>P. destructans</i> CCF3943                | 5.78             | 5.66 | 6.21 | 7.53                       | 7.26 | 7.6  |
| <i>P. destructans</i> CCF4103                | 5.4              | 5.32 | 5.3  | 8.04                       | 7.86 | 7.72 |
| <i>P. destructans</i> CCF4986                | 6.69             | 6.54 | 6.39 | 8.77                       | 8.35 | 8.75 |
| <i>P. destructans</i> CCF4987                | 5.52             | 5.71 | 5.71 | 7.43                       | 7.19 | 7.51 |
| <i>P. sp. 1</i> CCF5025                      | 5.67             | 5.56 | 5.81 | 7.9                        | 8.54 | 8.55 |
| <i>P. sp. 1</i> AK51/11                      | 5.95             | 6.00 | 5.96 | 8.89                       | 8.75 | 8.74 |
| <i>P. sp. 2</i> CCF5027                      | 5.05             | 5.07 | 5.06 | 8.84                       | 8.83 | 8.89 |
| <i>P. sp. 2</i> CCF5029                      | 4.39             | 5.4  | 5.29 | 8.89                       | 8.92 | 8.83 |
| <i>P. sp. 2</i> CCF5030                      | 6.06             | 5.29 | 5.41 | 8.84                       | 8.84 | 8.84 |
| <i>P. sp. 3</i> CCF5026                      | 5.7              | 5.66 | 5.8  | 8.75                       | 8.79 | 8.74 |
| <i>Aspergillus flavus</i> CCF3154            | 8.52             | 8.52 | 7.59 | 8.39                       | 8.37 | 8.25 |
| <i>A. luchvensis</i> CCF3984                 | 6.66             | 6.61 | 6.54 | 8.13                       | 7.89 | 8.1  |
| <i>P. oxalicum</i> 2315T                     | 4.46             | 4.5  | 4.5  | 5.36                       | 5.65 | 5.67 |
| <i>Arthroderma uncinatum</i> CCF2907         | 7.74             | 7.5  | 7.79 | 5.46                       | 5.37 | 5.13 |
| <i>Microsporum canis</i> PL1077/16           | 7.26             | 7.37 | 7.44 | 9.01                       | 8.14 | 8.99 |
| <i>M. gypseum</i> CCF4749                    | 7.82             | 7.54 | 7.55 | 9.08                       | 9.09 | 8.96 |
| <i>Trichophyton interdigitale</i> CCF4473    | 8.31             | 8.35 | 8.38 | 8.58                       | 7.54 | 8.5  |
| <i>T. terrestre</i> DMF3040/13               | 7.61             | 7.67 | 7.67 | 8.75                       | 8.28 | 9.03 |
| Sterile media                                | 5.58             | 5.6  | 5.61 | 5.78                       | 5.72 | 5.74 |

A, B, C – three replication for each strain analysed.

**Table S3:** Percentage of viable conidia for *Pseudogymnoascus destructans*, other cave *P.* species, and outdoor saprotroph *Aspergillus* species.

| stressful condition | day | <i>Pseudogymnoascus destructans</i> strains |          |          |          |          |          |          |          |      |      | <i>Pseudogymnoascus</i> species |          |          |      |      | <i>Aspergillus</i> species |          |      |      |
|---------------------|-----|---------------------------------------------|----------|----------|----------|----------|----------|----------|----------|------|------|---------------------------------|----------|----------|------|------|----------------------------|----------|------|------|
|                     |     | CCF 3938                                    | CCF 3941 | CCF 3943 | CCF 4103 | CCF 4124 | CCF 4129 | CCF 4131 | CCF 4132 | Mean | SD   | AK 77/11                        | AK 51/11 | AK 71/11 | Mean | SD   | CCF 3154                   | CCF 3984 | Mean | SD   |
| control             | 2   | 90.0                                        | 91.0     | NA       | NA       | NA       | NA       | NA       | 92.0     | 91.0 | 1.0  | 94.5                            | 78.3     | 95.0     | 89.3 | 9.5  | 90.1                       | 93.0     | 91.6 | 1.5  |
|                     | 7   | 88.9                                        | 77.3     | 81.1     | 84.7     | 86.8     | 85.3     | 86.8     | 86.2     | 84.6 | 3.7  | 94.0                            | 76.4     | 91.6     | 87.3 | 9.5  | 87.4                       | 91.2     | 89.3 | 1.9  |
|                     | 14  | 78.9                                        | 82.6     | 78.5     | 82.9     | 86.3     | 85.8     | 84.4     | 76.2     | 81.9 | 3.7  | 76.1                            | 78.9     | 93.0     | 82.7 | 9.1  | 70.2                       | 93.6     | 81.9 | 11.7 |
|                     | 21  | 85.4                                        | 84.6     | 78.6     | 80.2     | 82.5     | 70.8     | 84.2     | 85.6     | 81.5 | 5.0  | 88.9                            | 69.7     | 80.0     | 79.5 | 9.6  | 88.7                       | 90.3     | 89.5 | 0.8  |
|                     | 28  | 84.9                                        | 74.3     | 80.9     | 81.6     | 88.3     | 79.4     | 84.4     | 80.8     | 81.8 | 4.2  | 72.9                            | 67.8     | 93.8     | 78.2 | 13.7 | 89.9                       | 93.2     | 91.6 | 1.7  |
|                     | 35  | 83.5                                        | 68.0     | 78.5     | 80.2     | 88.4     | 77.4     | 79.9     | 74.4     | 78.8 | 6.0  | 77.2                            | 67.3     | 95.8     | 80.1 | 14.5 | 89.4                       | 76.5     | 82.9 | 6.5  |
|                     | 42  | 86.6                                        | 72.1     | 79.1     | 76.6     | 83.2     | 83.2     | 82.1     | 86.5     | 81.2 | 5.0  | 63.6                            | 57.1     | 94.8     | 71.8 | 20.1 | 69.9                       | 89.4     | 79.6 | 9.7  |
| UVA,B               | 2   | 76.1                                        | NA       | NA       | NA       | NA       | NA       | NA       | 86.2     | 81.2 | 7.1  | 88.1                            | 53.5     | 92.7     | 78.1 | 21.4 | 81.5                       | 92.6     | 87.1 | 5.5  |
|                     | 7   | 74.1                                        | NA       | 85.7     | 73.3     | 89.5     | NA       | 82.4     | 84.4     | 81.6 | 6.5  | 89.6                            | 75.6     | 86.9     | 84.0 | 7.5  | 86.3                       | 87.6     | 87.0 | 0.6  |
|                     | 14  | 70.9                                        | NA       | 43.7     | 53.0     | 77.3     | NA       | 43.8     | 72.5     | 60.2 | 15.2 | 86.6                            | 38.2     | 85.7     | 70.2 | 27.7 | 85.0                       | 85.1     | 85.0 | 0.1  |
|                     | 21  | 69.3                                        | NA       | 54.5     | 32.2     | 57.7     | NA       | 56.6     | 81.3     | 58.6 | 16.4 | 58.9                            | 34.3     | 76.2     | 56.5 | 21.0 | 91.2                       | 86.1     | 88.7 | 2.6  |
|                     | 28  | 74.0                                        | NA       | 59.8     | 40.8     | 81.1     | NA       | 69.3     | 82.0     | 67.8 | 15.6 | 76.9                            | 40.7     | 84.0     | 67.2 | 23.2 | 75.6                       | 93.7     | 84.7 | 9.0  |
|                     | 35  | 65.7                                        | NA       | 44.7     | 25.2     | 48.3     | NA       | 38.4     | 57.8     | 46.7 | 14.3 | 75.4                            | 30.5     | 80.4     | 62.1 | 27.5 | 80.5                       | 94.2     | 87.4 | 6.9  |
|                     | 42  | 76.5                                        | NA       | 8.1      | 38.8     | NA       | NA       | 46.0     | 79.6     | 49.8 | 29.5 | 64.2                            | 55.6     | 88.8     | 69.5 | 17.2 | 75.5                       | 87.1     | 81.3 | 5.8  |
| light               | 2   | 82.0                                        | 76.5     | NA       | NA       | NA       | NA       | NA       | 90.2     | 82.9 | 6.9  | 67.0                            | 70.3     | 96.2     | 77.8 | 13.0 | 84.4                       | 94.5     | 89.4 | 5.1  |
|                     | 7   | 93.5                                        | 74.3     | 52.5     | NA       | 87.0     | 89.1     | 87.6     | 89.1     | 81.9 | 14.2 | 82.2                            | 76.8     | 92.5     | 83.9 | 6.5  | 84.5                       | 88.3     | 86.4 | 1.9  |
|                     | 14  | 91.9                                        | 76.2     | 66.3     | NA       | 87.5     | 86.2     | 83.7     | 67.9     | 80.0 | 10.0 | 88.4                            | 75.4     | 92.7     | 85.5 | 7.3  | 76.1                       | 72.8     | 74.5 | 1.7  |
|                     | 21  | 86.3                                        | 54.7     | 76.6     | NA       | 75.3     | 76.7     | 77.0     | 88.2     | 76.4 | 10.9 | 84.1                            | 79.9     | 89.2     | 84.4 | 3.8  | 90.8                       | 87.3     | 89.1 | 1.7  |
|                     | 28  | 83.3                                        | 48.2     | 76.0     | NA       | 73.1     | 84.2     | 81.0     | 84.8     | 75.8 | 12.9 | 74.0                            | 69.4     | 94.4     | 79.3 | 10.9 | 87.3                       | 94.2     | 90.8 | 3.5  |
|                     | 35  | 87.4                                        | 36.1     | 71.2     | NA       | 28.6     | 82.6     | 72.8     | 61.8     | 62.9 | 22.5 | 86.3                            | 50.0     | 95.0     | 77.1 | 19.5 | 70.7                       | 91.6     | 81.2 | 10.4 |
|                     | 42  | 86.4                                        | 27.3     | 71.4     | NA       | 63.1     | 61.9     | 64.3     | 76.5     | 64.4 | 18.6 | 87.6                            | 80.6     | 77.3     | 81.8 | 4.3  | 78.7                       | 91.8     | 85.3 | 6.6  |
| UVA                 | 2   | 82.5                                        | 65.3     | NA       | NA       | NA       | NA       | NA       | 87.7     | 78.5 | 11.7 | 93.5                            | 72.7     | 94.7     | 87.0 | 10.1 | 84.2                       | 95.5     | 89.8 | 5.7  |
|                     | 7   | 93.2                                        | 67.9     | 71.0     | 92.7     | 92.4     | 90.9     | 86.5     | 84.3     | 84.9 | 10.1 | 86.5                            | 71.0     | 89.5     | 82.3 | 8.1  | 87.3                       | 92.5     | 89.9 | 2.6  |
|                     | 14  | 88.6                                        | 32.5     | 52.2     | 41.9     | 78.0     | 81.8     | 80.3     | 65.4     | 65.1 | 20.7 | 91.1                            | 82.6     | 91.8     | 88.5 | 4.2  | 74.7                       | 86.6     | 80.6 | 6.0  |
|                     | 21  | 79.5                                        | 22.8     | 54.8     | 10.2     | 67.3     | 71.2     | 48.8     | 74.6     | 53.6 | 25.2 | 75.8                            | 71.5     | 83.6     | 77.0 | 5.0  | 86.4                       | 82.9     | 84.6 | 1.8  |
|                     | 28  | 70.7                                        | 19.4     | 60.3     | 72.2     | 50.1     | 83.9     | 48.6     | 78.8     | 60.5 | 20.9 | 84.6                            | 42.7     | 92.6     | 73.3 | 21.9 | 89.8                       | 92.8     | 91.3 | 1.5  |
|                     | 35  | 69.8                                        | 2.6      | 58.8     | 50.9     |          | 58.3     | 44.4     | 58.6     | 49.0 | 21.9 | 59.3                            | 23.8     | 90.5     | 57.9 | 27.2 | 84.9                       | 85.5     | 85.2 | 0.3  |
|                     | 42  | 60.8                                        | 14.2     | 57.9     | 73.5     | 70.1     | 43.5     | 77.4     | 71.5     | 58.6 | 21.0 | 81.9                            | 10.8     | 76.1     | 56.3 | 32.2 | 75.4                       | 91.4     | 83.4 | 8.0  |
| 30 °C               | 2   | 73.3                                        | 73.7     | NA       | NA       | NA       | NA       | NA       | 86.3     | 77.8 | 7.4  | 91.5                            | 78.7     | 95.9     | 88.7 | 7.3  | 88.8                       | 94.1     | 91.5 | 2.7  |
|                     | 7   | 89.0                                        | 65.9     | 81.1     | 69.3     | 82.4     | 77.1     | 68.6     | 83.2     | 77.1 | 8.3  | 89.3                            | 67.9     | 91.9     | 83.0 | 10.8 | 81.1                       | 77.1     | 79.1 | 2.0  |
|                     | 14  | 92.1                                        | 58.9     | 61.2     | 67.4     | 80.2     | 79.5     | 76.7     | 57.8     | 71.7 | 12.3 | 77.0                            | 74.5     | 81.9     | 77.8 | 3.1  | 79.3                       | 78.7     | 79.0 | 0.3  |
|                     | 21  | 91.1                                        | 50.6     | 67.0     | 87.3     | 47.0     | 79.5     | 72.2     | 69.9     | 70.6 | 15.8 | 53.2                            | 70.5     | 77.8     | 67.2 | 10.3 | 88.1                       | 87.8     | 88.0 | 0.1  |
|                     | 28  | 80.4                                        | 34.6     | 72.2     | 85.0     | 77.0     | 83.5     | 64.9     | 79.6     | 72.2 | 16.5 | 57.1                            | 3.3      | 79.5     | 46.7 | 32.0 | 88.6                       | 95.4     | 92.0 | 3.4  |
|                     | 35  | 82.3                                        | 42.1     | 76.6     | 72.4     | 77.9     | 78.3     | 60.4     | 73.2     | 70.4 | 13.1 | 48.0                            | 2.5      | 84.4     | 45.0 | 33.5 | 84.3                       | 85.0     | 84.6 | 0.4  |
|                     | 42  | 86.1                                        | 18.1     | 39.2     | 46.9     | 68.1     | 53.1     | 53.1     | 67.1     | 53.9 | 20.6 | 47.2                            | 7.0      | 78.1     | 44.1 | 29.1 | 79.2                       | 92.4     | 85.8 | 6.6  |
| 37°C                | 2   | 81.1                                        | 81.1     | NA       | NA       | NA       | NA       | NA       | 88.2     | 83.5 | 4.1  | 78.4                            | 70.7     | 95.6     | 81.6 | 10.4 | 95.2                       | 95.4     | 95.3 | 0.1  |

|          |    |      |      |      |      |      |      |      |      |      |      |      |      |      |      |      |      |      |      |      |
|----------|----|------|------|------|------|------|------|------|------|------|------|------|------|------|------|------|------|------|------|------|
|          | 7  | 78.1 | 78.1 | 80.2 | NA   | 37.4 | 73.9 | NA   | 83.2 | 71.8 | 17.1 | 41.8 | 76.8 | 92.7 | 70.4 | 21.3 | 82.8 | 93.3 | 88.1 | 5.3  |
|          | 14 | 37.5 | 37.5 | 52.9 | NA   | 31.9 | 31.2 | NA   | 26.0 | 36.2 | 9.3  | 61.1 | 12.0 | 23.7 | 32.2 | 20.9 | 81.4 | 83.1 | 82.3 | 0.8  |
|          | 21 | 1.6  | 1.6  | 7.1  | NA   | 3.9  | 3.2  | NA   | 2.9  | 3.4  | 2.1  | 0.7  | 3.3  | 2.9  | 2.3  | 1.1  | 81.2 | 88.6 | 84.9 | 3.7  |
|          | 28 | 1.0  | 1.0  | 9.0  | NA   | 9.5  | 5.5  | NA   | 6.2  | 5.4  | 3.7  | 2.1  | 3.3  | 4.3  | 3.2  | 0.9  | 90.4 | 94.7 | 92.5 | 2.2  |
|          | 35 | 1.2  | 1.2  | 3.5  | NA   | 6.3  | 4.8  | NA   | 2.8  | 3.3  | 2.0  | 7.8  | 2.1  | 2.7  | 4.2  | 2.5  | 77.7 | 94.0 | 85.8 | 8.1  |
|          | 42 | 1.0  | 1.0  | 2.0  | NA   | 9.5  | 3.0  | NA   | 6.4  | 3.8  | 3.4  | 7.5  | 3.9  | 7.5  | 6.3  | 1.7  | 75.8 | 91.3 | 83.5 | 7.7  |
| dryness  | 2  | 71.1 | 63.1 | NA   | NA   | NA   | NA   | NA   | 87.6 | 73.9 | 12.5 | 46.4 | 52.8 | 92.4 | 63.9 | 20.4 | 69.6 | 93.1 | 81.4 | 11.8 |
|          | 7  | 84.2 | 21.3 | 63.5 | 80.6 | 71.3 | 79.5 | 60.2 | 74.3 | 66.9 | 20.2 | 77.0 | 59.7 | 89.5 | 75.4 | 12.2 | 80.3 | 93.8 | 87.0 | 6.7  |
|          | 14 | 86.0 | 18.4 | 53.5 | 80.6 | 71.4 | 66.9 | 65.1 | 71.4 | 64.2 | 20.9 | 71.5 | 64.6 | 85.1 | 73.8 | 8.5  | 66.1 | 83.1 | 74.6 | 8.5  |
|          | 21 | 69.3 | 6.8  | 51.4 | 87.8 | 28.8 | 79.1 | 45.3 | 77.3 | 55.7 | 28.0 | 63.5 | 53.7 | 85.7 | 67.7 | 13.4 | 79.3 | 84.8 | 82.1 | 2.8  |
|          | 28 | 80.3 | 7.3  | 46.6 | 76.8 | 62.1 | 72.2 | 65.2 | 73.7 | 60.5 | 24.0 | 78.4 | 49.8 | 93.0 | 73.7 | 18.0 | 91.1 | 91.2 | 91.2 | 0.0  |
|          | 35 | 76.1 | 15.7 | 50.1 | 71.8 | 40.3 | 73.8 | 60.6 | 84.2 | 59.1 | 22.7 | 68.7 | 64.1 | 89.6 | 74.1 | 11.1 | 81.2 | 92.8 | 87.0 | 5.8  |
|          | 42 | 72.0 | 7.4  | 46.9 | 76.8 | 74.2 | 67.7 | 61.7 | 78.3 | 60.6 | 23.8 | 71.1 | 70.8 | 87.0 | 76.3 | 7.6  | 62.5 | 88.7 | 75.6 | 13.1 |
| 25°C     | 2  | 84.5 | 73.6 | NA   | NA   | NA   | NA   | NA   | 91.3 | 83.1 | 8.9  | 94.0 | 72.9 | 95.0 | 87.3 | 10.2 | 84.5 | 90.5 | 87.5 | 3.0  |
|          | 7  | 87.3 | 64.0 | NA   | 77.1 | 92.7 | 92.6 | 71.8 | 85.9 | 81.6 | 11.0 | 85.6 | 73.1 | 87.2 | 82.0 | 6.3  | 87.8 | 93.3 | 90.5 | 2.8  |
|          | 14 | 89.0 | 62.0 | NA   | 83.2 | 76.6 | 87.7 | 52.1 | 75.2 | 75.1 | 13.7 | 88.2 | 77.5 | 92.9 | 86.2 | 6.5  | 79.4 | 84.6 | 82.0 | 2.6  |
|          | 21 | 89.0 | 79.4 | NA   | 82.0 | 90.9 | 84.4 | 71.0 | 85.8 | 83.2 | 6.7  | 82.9 | 77.0 | 91.9 | 83.9 | 6.1  | 92.7 | 86.1 | 89.4 | 3.3  |
|          | 28 | 66.1 | 73.1 | NA   | 69.1 | 91.2 | 89.2 | 76.2 | 84.9 | 78.5 | 9.9  | 79.3 | 71.8 | 95.0 | 82.0 | 9.7  | 94.8 | 93.0 | 93.9 | 0.9  |
|          | 35 | 80.9 | 48.9 | NA   | 68.1 | 87.3 | 83.2 | 64.3 | 67.9 | 71.5 | 13.3 | 80.6 | 59.6 | 94.0 | 78.1 | 14.2 | 74.6 | 92.9 | 83.8 | 9.1  |
|          | 42 | 90.7 | 58.5 | NA   | 76.8 | 87.7 | 84.8 | 71.4 | 83.2 | 79.0 | 11.2 | 83.3 | 72.1 | 92.9 | 82.8 | 8.5  | 74.6 | 89.7 | 82.1 | 7.5  |
| 34 °C    | 2  | NA   | NA   | NA   | NA   | NA   | NA   | NA   | NA   | NA   | NA   | NA   | NA   | NA   | NA   | NA   | NA   | NA   | NA   | NA   |
|          | 7  | 88.9 | 58.0 | 70.5 | 83.1 | 82.8 | 80.4 | 51.9 | 77.6 | 74.1 | 13.0 | NA   | NA   | NA   | NA   | NA   | NA   | NA   | NA   | NA   |
|          | 14 | 51.7 | 20.1 | 86.0 | 81.7 | 83.0 | 85.8 | 82.0 | 35.0 | 65.7 | 26.3 | NA   | NA   | NA   | NA   | NA   | NA   | NA   | NA   | NA   |
|          | 21 | 36.9 | 9.0  | 62.9 | 59.2 | 52.3 | 58.7 | 69.9 | 10.5 | 44.9 | 23.7 | NA   | NA   | NA   | NA   | NA   | NA   | NA   | NA   | NA   |
|          | 28 | 30.9 | 3.8  | 27.6 | 38.6 | 24.7 | 11.5 | 19.7 | 6.0  | 20.3 | 12.4 | NA   | NA   | NA   | NA   | NA   | NA   | NA   | NA   | NA   |
|          | 35 | 4.1  | 8.5  | 9.5  | 14.4 | 16.6 | 4.3  | 18.4 | 2.9  | 9.8  | 6.0  | NA   | NA   | NA   | NA   | NA   | NA   | NA   | NA   | NA   |
|          | 42 | 1.8  | 6.1  | 4.6  | 1.7  | 3.4  | 2.2  | 1.7  | 5.5  | 3.4  | 1.8  | NA   | NA   | NA   | NA   | NA   | NA   | NA   | NA   | NA   |
| 34/20 °C | 2  | NA   | NA   | NA   | NA   | NA   | NA   | NA   | NA   | NA   | NA   | NA   | NA   | NA   | NA   | NA   | NA   | NA   | NA   | NA   |
|          | 7  | 88.2 | NA   | 62.5 | 88.7 | 78.4 | 81.9 | 57.8 | 89.6 | 78.1 | 13.0 | NA   | NA   | NA   | NA   | NA   | NA   | NA   | NA   | NA   |
|          | 14 | 86.4 | NA   | 46.2 | 91.9 | 83.5 | 89.0 | 83.3 | 78.6 | 79.8 | 15.4 | NA   | NA   | NA   | NA   | NA   | NA   | NA   | NA   | NA   |
|          | 21 | 76.6 | NA   | 86.4 | 73.7 | 63.0 | 83.9 | 70.2 | 46.2 | 71.4 | 13.7 | NA   | NA   | NA   | NA   | NA   | NA   | NA   | NA   | NA   |
|          | 28 | 67.2 | NA   | 83.0 | 88.5 | 82.1 | 77.8 | 68.9 | 53.3 | 74.4 | 12.1 | NA   | NA   | NA   | NA   | NA   | NA   | NA   | NA   | NA   |
|          | 35 | 81.1 | NA   | 75.5 | 78.0 | 75.2 | 73.5 | 55.5 | 45.7 | 69.2 | 13.3 | NA   | NA   | NA   | NA   | NA   | NA   | NA   | NA   | NA   |
|          | 42 | 83.3 | NA   | 77.4 | 87.2 | 61.7 | 82.2 | 63.5 | 26.7 | 68.8 | 21.0 | NA   | NA   | NA   | NA   | NA   | NA   | NA   | NA   | NA   |

NA – not available

**Figure S1:** Data analyses from flow cytometry – gating strategy.

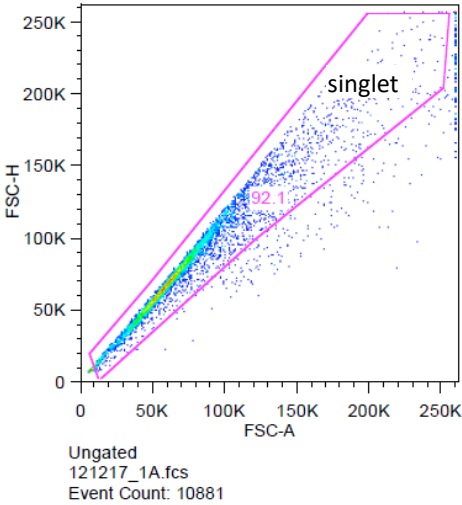

Data was first checked on FSC-A – FSC-H plot to gate population “singlet” which ensures that only separated conidia will be analyzed and all conidial clusters will be omitted.

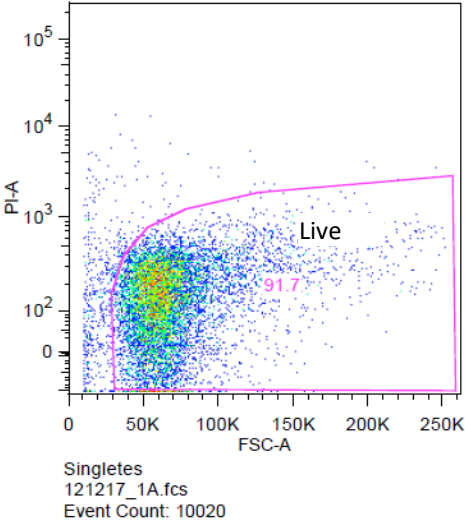

All events in “singlet” population with PI fluorescence under threshold (defined by measurements of unlabeled conidia) were gated to population “Live” which contains living conidia with negative PI fluorescence.

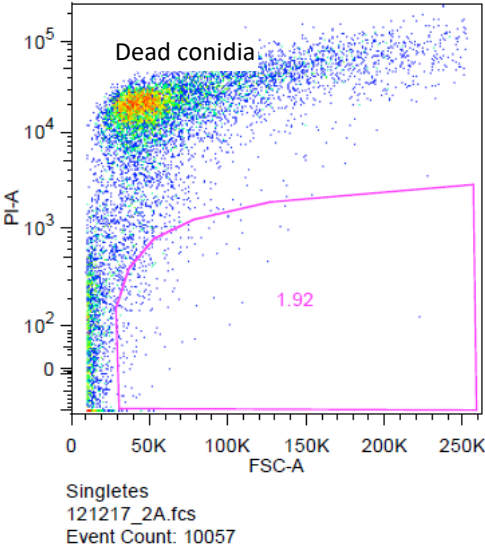

All events with higher fluorescence intensities than defined threshold represent dead conidia, as PI can stain only dead cells.
